# Supplementary material for: Susceptibility to exertional heat illness and hospitalisation risk in UK military personnel
Source: HighWire-hosted journal article supplement (doi:10.1136/bmjsem-2015-000055), 2015-10-01
Supplement: bmjsem-2015-000055supp_figure.pdf [file bmjsem-2015-000055supp_figure.pdf]

**HEAT ILLNESS MEDICAL REPORTING FORM**

**CASUALTY DETAILS**

|                |  |                          |  |         |                                      |
|----------------|--|--------------------------|--|---------|--------------------------------------|
| Service Number |  | Initials                 |  | Surname |                                      |
| Rank           |  | JMES at time of incident |  |         |                                      |
| DoB            |  | DMICP No (if known)      |  | Duty    | Exercise / Ops / Sport / Other ..... |

**INCIDENT DETAILS (complete as fully as available information permits)**

|                      |  |                    |                                                                                                                                                                                                                    |
|----------------------|--|--------------------|--------------------------------------------------------------------------------------------------------------------------------------------------------------------------------------------------------------------|
| Date of Incident     |  | Time (Local)       |                                                                                                                                                                                                                    |
| Activity undertaken: |  | Location: (exact)  |                                                                                                                                                                                                                    |
| Clothing Worn:       |  | WBGT Reading       |                                                                                                                                                                                                                    |
| Equipment Carried:   |  | WBGT Location:     | At scene <input type="checkbox"/><br>Locally <input type="checkbox"/><br>Provided by area met <input type="checkbox"/><br>Provided by forecast <input type="checkbox"/><br>Source unknown <input type="checkbox"/> |
| Weight Carried:      |  | Date & time taken: |                                                                                                                                                                                                                    |

**CLINICAL DETAILS**

|                                      |                                       |                                                                |                                                                                                                                    |                              |  |
|--------------------------------------|---------------------------------------|----------------------------------------------------------------|------------------------------------------------------------------------------------------------------------------------------------|------------------------------|--|
| Casualty Temp                        |                                       | Temperature type?<br>Note – rectal is preferred                | Rectal <input type="checkbox"/><br>Oral <input type="checkbox"/><br>Axilla <input type="checkbox"/><br>TM <input type="checkbox"/> | Time temp was taken (local)? |  |
| Signs and Symptoms                   |                                       |                                                                |                                                                                                                                    |                              |  |
| Clinical Measurements                | GCS:                                  |                                                                | Pulse:                                                                                                                             |                              |  |
|                                      | Seizure:                              | Yes / No                                                       | B/P:                                                                                                                               |                              |  |
| Working Diagnosis                    |                                       |                                                                |                                                                                                                                    |                              |  |
| Subsequent Action (Cooling, IVI etc) |                                       |                                                                |                                                                                                                                    |                              |  |
| Disposal                             | Discharged <input type="checkbox"/>   | Refer to SHC for outpatient follow-up <input type="checkbox"/> |                                                                                                                                    |                              |  |
|                                      | Admit Role 1 <input type="checkbox"/> | Admit Role 2/3 <input type="checkbox"/>                        |                                                                                                                                    |                              |  |
|                                      | Other <input type="checkbox"/>        | State:                                                         |                                                                                                                                    |                              |  |

**PREDISPOSING FACTORS (mark all that apply)**

|                                            |                          |                     |                          |                                                                                                                                                                                           |
|--------------------------------------------|--------------------------|---------------------|--------------------------|-------------------------------------------------------------------------------------------------------------------------------------------------------------------------------------------|
| Previous Heat Illness                      | <input type="checkbox"/> | Un-acclimatised     | <input type="checkbox"/> | Medication / Drugs:<br>Prescribed <input type="checkbox"/><br>Over The Counter <input type="checkbox"/><br>Supplements /herbal <input type="checkbox"/><br>Other <input type="checkbox"/> |
| Out of date fitness test                   | <input type="checkbox"/> | Dehydration         | <input type="checkbox"/> |                                                                                                                                                                                           |
| Sleep deprived / exhausted                 | <input type="checkbox"/> | Alcohol (prev 48hr) | <input type="checkbox"/> |                                                                                                                                                                                           |
| Respiratory Infection or Febrile Illness   | <input type="checkbox"/> | Current smoker      | <input type="checkbox"/> |                                                                                                                                                                                           |
| Safety briefing received prior to incident | <input type="checkbox"/> |                     |                          |                                                                                                                                                                                           |

**PERSON COMPLETING FORM**

|                                        |          |      |  |
|----------------------------------------|----------|------|--|
| Name of MO / NO / Medic                |          | Date |  |
| Signature                              |          | Unit |  |
| Consent given by patient for reporting | Yes / No |      |  |
